# Supplementary material for: Content validity of the ASQoL for use in a non-radiographic axial spondyloarthritis population: a qualitative study
Source: Qual Life Res. 2020 Jul 1;29(11):3155–66. doi: 10.1007/s11136-020-02552-z (PMC7591417; doi:10.1007/s11136-020-02552-z)
Supplement: Supplementary file 1 — Electronic supplementary material 1 (DOCX 22 kb) [file 11136_2020_2552_MOESM1_ESM.docx]

# Content validity of the ASQoL for use in a non-radiographic axial spondyloarthritis population

Mark C. Hwang,1 Mona Martin,2 Kristina Harris,3 Philip Geerdts,4 Jeffrey L. Stark,5 
John Reveille1

1The University of Texas Health Science Center at Houston, McGovern Medical School, Houston, TX, USA

2Evidera PPD LLC, Bethesda, MD, USA

3UCB Pharma, Hong Kong, China

4UCB Pharma, Slough, UK

5UCB Pharma, Smyrna, GA, USA

**Journal:** Quality of Life Research

**Corresponding author email:** Mark.C.Hwang@uth.tmc.edu

**Online Resource 1.** Data saturation: number of concepts (Group 1) and new concepts (Groups 2–4). Saturation was calculated across transcript groups. Transcripts were grouped chronologically in the order the interviews were conducted.

| **Concept description** | **Group 1 (n=5 transcripts)** | **Group 2 (n=5 transcripts)** | **Group 3 (n=4 transcripts)** | **Group 4 (n=4 transcripts)** |
| --- | --- | --- | --- | --- |
| **Tiredness and fatigue** | | | | |
| Daytime sleepiness |  | X |  |  |
| Exhaustion |  | X |  |  |
| Fatigue | X |  |  |  |
| Lack of motivation |  |  |  | X |
| Low energy | X |  |  |  |
| Tiredness | X |  |  |  |
| Weakness | X |  |  |  |
| **Sleep quality** | | | | |
| Poor sleep quality | X |  |  |  |
| Sleep position limited | X |  |  |  |
| Trouble falling asleep | X |  |  |  |
| Trouble staying asleep | X |  |  |  |
| **Pain** | | | | |
| Arm pain |  | X |  |  |
| Low back pain | X |  |  |  |
| Mid back pain | X |  |  |  |
| Upper back pain | X |  |  |  |
| General back pain | X |  |  |  |
| Chest pain |  | X |  |  |
| Diaphragm pain |  | X |  |  |
| Hip pain | X |  |  |  |
| Joint pain | X |  |  |  |
| Leg or foot pain | X |  |  |  |
| Neck pain | X |  |  |  |
| Rib pain |  | X |  |  |
| Pelvis pain |  |  | X |  |
| Shooting pain |  |  | X |  |
| Spine pain | X |  |  |  |
| Unspecified pain | X |  |  |  |
| **Swelling** | | | | |
| Diaphragm swelling |  | X |  |  |
| Heel swelling |  | X |  |  |
| Joint swelling | X |  |  |  |
| Limb swelling | X |  |  |  |
| Low back swelling |  |  |  | X |
| **Muscle contraction** | | | | |
| Muscle spasms | X |  |  |  |
| Posture and stature changes | X |  |  |  |
| Stiffness | X |  |  |  |
| Tightness | X |  |  |  |
| **Additional symptoms** | | | | |
| Headache or migraine | X |  |  |  |
| Iritis | X |  |  |  |
| Joint popping | X |  |  |  |
| Numbness | X |  |  |  |
| Restless legs | X |  |  |  |
| Tenderness | X |  |  |  |
| **Physical activity limitations and restrictions** | | | | |
| Exercise impacted | X |  |  |  |
| Sports impacted | X |  |  |  |
| Walking impacted | X |  |  |  |
| **Restricted body movements** | | | | |
| Balance issues and falling | X |  |  |  |
| Trouble bending | X |  |  |  |
| Trouble getting in/out of a car |  | X |  |  |
| Hand mobility issues |  |  | X |  |
| Trouble lifting and carrying | X |  |  |  |
| Trouble lifting leg |  |  | X |  |
| Trouble reaching |  | X |  |  |
| Trouble rising from another position | X |  |  |  |
| Sitting impacted | X |  |  |  |
| Trouble with stairs | X |  |  |  |
| Trouble standing | X |  |  |  |
| Trouble turning and twisting | X |  |  |  |
| **Difficulty getting around** | | | | |
| Difficulty driving | X |  |  |  |
| Difficulty getting around | X |  |  |  |
| Travel impacted | X |  |  |  |
| **Difficulty doing daily activity** | | | | |
| Childcare impacted | X |  |  |  |
| Difficulty eating |  | X |  |  |
| Difficulty with housework and chores | X |  |  |  |
| Difficulty with general activities | X |  |  |  |
| Difficulty with personal care | X |  |  |  |
| Impacts on work | X |  |  |  |
| **Social and lifestyle limitations and restrictions** | | | | |
| Leisure activities impacted | X |  |  |  |
| Relationships affected | X |  |  |  |
| Sexual activity affected | X |  |  |  |
| Social activities affected | X |  |  |  |
| **Emotional impacts** | | | | |
| Anger or irritation | X |  |  |  |
| Anxiety | X |  |  |  |
| Depression | X |  |  |  |
| Frustration | X |  |  |  |
| Low self-esteem | X |  |  |  |
| Worry or fear | X |  |  |  |
| **Aspects of burden** | | | | |
| Needs assistance | X |  |  |  |
| **Coping behaviour** | | | | |
| Coping strategy | X |  |  |  |
| **Additional impacts** | | | | |
| Decreased quality of life |  |  |  | X |
| **Number (%) of concepts encoded in each group**  **(N=78)** | **61 (78.2)** | **11 (14.1)** | **4 (5.1)** | **3 (3.8)** |

**Online Resource 2.** Impact concepts and code frequencies

| **nr-axSpA symptom  sub‑domains and concepts** | **Total impact concept expressions, n (%)** | **Transcripts contributing to concept expression, n (%)** |
| --- | --- | --- |
| **Physical activity limitations and restrictions** | **74 (11.0)** |  |
| Walking impacted | 45 (6.8) | 15 (83.3) |
| Sports impacted | 16 (2.4) | 5 (27.8) |
| Exercise impacted | 12 (1.8) | 7 (38.9) |
| **Restricted body movements** | **154 (23.0)** |  |
| Sitting impacted | 28 (4.1) | 11 (61.1) |
| Trouble bending | 26 (3.8) | 13 (72.2) |
| Trouble lifting and carrying | 20 (2.9) | 9 (50.0) |
| Trouble rising from another position | 17 (2.5) | 11 (61.1) |
| Trouble with stairs | 16 (2.4) | 12 (66.7) |
| Trouble standing | 14 (2.1) | 10 (55.6) |
| Trouble turning and twisting | 10 (1.5) | 9 (50.0) |
| Balance issues and falling | 9 (1.3) | 5 (27.8) |
| Trouble getting in and out of car | 5 (0.7) | 3 (16.7) |
| Hand mobility issues | 3 (0.4) | 3 (16.7) |
| Trouble lifting leg | 3 (0.4) | 1 (5.6) |
| Trouble reaching | 2 (0.3) | 2 (11.1) |
| Other restricted body movementsa | 1 (0.1) | 1 (5.6) |
| **Difficulty getting around** | **78 (11.0)** |  |
| Difficulty driving | 33 (4.9) | 10 (55.6) |
| Travel impacted | 29 (4.3) | 12 (66.7) |
| Difficulty getting around | 16 (2.4) | 11 (61.1) |
| **Difficulty doing daily activity** | **131 (19.0)** |  |
| Difficulty with housework and chores | 41 (6.0) | 10 (55.6) |
| Difficulty with general activities | 36 (5.3) | 11 (61.1) |
| Difficulty with personal care | 27 (4.0) | 14 (77.8) |
| Impacts on work | 17 (2.5) | 9 (50.0) |
| Childcare impacted | 9 (1.3) | 5 (27.8) |
| Difficulty eating | 1 (0.1) | 1 (5.6) |
| **Social and lifestyle limitations and restrictions** | **79 (12.0)** |  |
| Social activities affected | 24 (3.5) | 9 (50.0) |
| Relationships affected | 23 (3.4) | 10 (55.6) |
| Leisure activities impacted | 18 (2.6) | 6 (33.3) |
| Sexual activity affected | 14 (2.1) | 6 (33.3) |
| **Emotional impacts** | **96 (14.0)** |  |
| Frustration | 28 (4.1) | 11 (61.1) |
| Anger or irritation | 16 (2.4) | 7 (38.9) |
| Low self-esteem | 16 (2.4) | 8 (44.4) |
| Worry or fear | 15 (2.2) | 7 (38.9) |
| Depression | 11 (1.6) | 7 (38.9) |
| Anxiety | 5 (0.7) | 3 (16.7) |
| Other emotional impactsb | 5 (0.7) | 3 (16.7) |
| **Aspects of burden** | **20 (2.9)** |  |
| Needs assistance | 20 (2.9) | 17 (94.4) |
| **Coping behaviour** | **46 (6.8)** |  |
| Coping strategy | 46 (6.8) | 11 (61.1) |
| **Additional impacts** | **2 (0.3)** |  |
| Decreased quality of life | 2 (0.3) | 1 (5.6) |

aIncluded laying down; bIncluded disgust, emotional instability, feels older and took a lot out of me
